# Supplementary material for: Checklist of bees (Hymenoptera: Apoidea) from small diversified vegetable farms in south-western Montana
Source: Biodivers Data J. 2019 Jan 28;(7):e30062. doi: 10.3897/BDJ.7.e30062 (PMC6361878; doi:10.3897/BDJ.7.e30062)
Supplement: Supplementary material 2 — Supplementary Table 2 [file bdj-07-e30062-s002.xlsx]

## Sheet: Sheet1
ID_parent	Name	Alternative Name	Country	State or province	Secondary subdivision	Locality	Latitude	Longitude	Elevation meters	Coll. start date	Collector	UID	NumberSpec	Sex	TypeStatus	DetBy	DetDate	Host Family	Host name	Depository
RUAC_ENT00004558	Andrena costillensis		USA	Montana	Deer Lodge	Anaconda Foothills	46.1278	-112.941	1600	1964-08-26	J. B. Karren	661487	1	Adult Female	None	W. E. LaBerge				Rutgers University
AMNH_BEE00163783	Pseudopanurgus irregularis	Protandrena irregularis	USA	Montana	Pondera	23 mi S of Shelby	48.1851	-111.933		1964-09-16	J. Schuh, W. Peters	719856	1	Adult Female	None	P. H. Timberlake	1968	Asteraceae	Grindelia	American Museum of Natural History
UCMS_ENT00050250	Lasioglossum cressonii		USA	Montana	Granite	Elkhorn Ranch, 9 mi S of Clinton	46.663	-113.71	1158	1971-06-26	J. R. Powers	989075	1	Adult Female	None	J. S. Ascher				University of Connecticut Museum at Storrs
AMNH_BEE00037029	Hoplitis spoliata		USA	Montana	Carbon	E Rosebud Canyon	46.2747	-106.442	1646	1966-08-13	B. Durden, C. Durden	382642	1	Adult Female	None	J. S. Ascher	2007			American Museum of Natural History
USGS_DRO181569	Lasioglossum laevissimum		USA	Montana	Flathead	Glacier National Park; meadow east of Flathead River (North Fork), west of North Fork Road.	48.7931	-114.294			Tara Carolin			Adult Female	None	Jason Gibbs	2012-09-08			United States Geological Survey
