# Supplementary material for: Checklist of bees (Hymenoptera: Apoidea) from small diversified vegetable farms in south-western Montana
Source: Biodivers Data J. 2019 Jan 28;(7):e30062. doi: 10.3897/BDJ.7.e30062 (PMC6361878; doi:10.3897/BDJ.7.e30062)
Supplement: Supplementary material 3 — Supplementary Table 3 [file bdj-07-e30062-s003.xls]

## Sheet: Taxa
Taxon_Local_ID	Kingdom	Subkingdom	Phylum	Subphylum	Superclass	Class	Subclass	Superorder	Order	Suborder	Infraorder	Superfamily	Family	Subfamily	Tribe	Subtribe	Genus	Subgenus	Species	Subspecies	Variety	Form	Authorship	Nomenclature	Feeds on	Symbiotic with	Parasite of	Host of	Native Status	Conservation Status	Distribution	Horizon	Notes
1	Animalia		Arthropoda			Insecta			Hymenoptera			Apoidea	Andrenidae
2	Animalia		Arthropoda			Insecta			Hymenoptera			Apoidea		Andreninae
3	Animalia		Arthropoda			Insecta			Hymenoptera			Apoidea			Andrenini
4	Animalia		Arthropoda			Insecta			Hymenoptera			Apoidea	Andrenidae	Andreninae	Andrenini		Andrena	Andrena	thaspii				Graenicher 1903										(Table 1: Sites 1-3).
5	Animalia		Arthropoda			Insecta			Hymenoptera			Apoidea	Andrenidae	Andreninae	Andrenini		Andrena	Andrena	topazana				Cockerell 1906										(Table 1: Sites 1, 3).
6	Animalia		Arthropoda			Insecta			Hymenoptera			Apoidea	Andrenidae	Andreninae	Andrenini		Andrena	Callandrena	helianthi				Robertson 1891										(Table 1: Sites 1-4).
7	Animalia		Arthropoda			Insecta			Hymenoptera			Apoidea	Andrenidae	Andreninae	Andrenini		Andrena	Cnemidandrena	costillensis				Viereck & Cockerell 1914										New species record for Montana (Donovan 1977); (Table 1: Sites 2, 3); Unpublished record on DiscoverLife (Supplementary Table 2). The closest records reported in Donovan (1977) for this species are from neighboring states Idaho and Wyoming.
8	Animalia		Arthropoda			Insecta			Hymenoptera			Apoidea	Andrenidae	Andreninae	Andrenini		Andrena	Diandrena	nothocalaidis				(Cockerell 1905)										(Table 1: Sites 2, 3).
9	Animalia		Arthropoda			Insecta			Hymenoptera			Apoidea	Andrenidae	Andreninae	Andrenini		Andrena	Euandrena	astragali				Viereck & Cockerell 1914										(Table 1: Sites 2-4).
10	Animalia		Arthropoda			Insecta			Hymenoptera			Apoidea	Andrenidae	Andreninae	Andrenini		Andrena	Euandrena	nigrocaerulea				Cockerell 1897										(Table 1: Sites 1-4).
11	Animalia		Arthropoda			Insecta			Hymenoptera			Apoidea	Andrenidae	Andreninae	Andrenini		Andrena	Holandrena	cressonii	infasciata			Robertson 1891										(Table 1: Sites 1-4).
12	Animalia		Arthropoda			Insecta			Hymenoptera			Apoidea	Andrenidae	Andreninae	Andrenini		Andrena	Melandrena	nivalis				Smith 1853										(Table 1: Sites 2, 3).
13	Animalia		Arthropoda			Insecta			Hymenoptera			Apoidea	Andrenidae	Andreninae	Andrenini		Andrena	Micrandrena	microchlora				Cockerell 1922										(Table 1: Sites 2, 3).
14	Animalia		Arthropoda			Insecta			Hymenoptera			Apoidea	Andrenidae	Andreninae	Andrenini		Andrena	Plastandrena	prunorum				Cockerell 1896										(Table 1: Sites 1-4).
15	Animalia		Arthropoda			Insecta			Hymenoptera			Apoidea	Andrenidae	Andreninae	Andrenini		Andrena	Scaphandrena	scurra				Viereck 1904										(Table 1: Site 1).
16	Animalia		Arthropoda			Insecta			Hymenoptera			Apoidea	Andrenidae	Andreninae	Andrenini		Andrena	Simandrena	nasonii				Robertson 1895										New species record for Montana (LaBerge 1989); (Table 1: Sites 1, 2). The closest record reported in LaBerge (1989) for this species is from neighboring state North Dakota.
17	Animalia		Arthropoda			Insecta			Hymenoptera			Apoidea	Andrenidae	Andreninae	Andrenini		Andrena	Simandrena	pallidifovea				(Viereck 1904)										(Table 1: Sites 2, 3).
18	Animalia		Arthropoda			Insecta			Hymenoptera			Apoidea	Andrenidae	Andreninae	Andrenini		Andrena	Thysandrena	candida				Smith 1879										(Table 1: Sites 2-4).
19	Animalia		Arthropoda			Insecta			Hymenoptera			Apoidea	Andrenidae	Andreninae	Andrenini		Andrena	Thysandrena	medionitens				Cockerell 1902										(Table 1: Sites 1-4).
20	Animalia		Arthropoda			Insecta			Hymenoptera			Apoidea	Andrenidae	Andreninae	Andrenini		Andrena	Thysandrena	vierecki				Cockerell 1904										(Table 1: Site 2).
21	Animalia		Arthropoda			Insecta			Hymenoptera			Apoidea	Andrenidae	Andreninae	Andrenini		Andrena	Trachandrena	hippotes				Robertson 1895										(Table 1: Site 2).
22	Animalia		Arthropoda			Insecta			Hymenoptera			Apoidea	Andrenidae	Andreninae	Andrenini		Andrena	Trachandrena	miranda				Smith 1879										(Table 1: Sites 2, 3).
23	Animalia		Arthropoda			Insecta			Hymenoptera			Apoidea	Andrenidae	Andreninae	Andrenini		Andrena	Tylandrena	aff. wilmattae				Cockerell 1906										(Table 1: Site 1).
24	Animalia		Arthropoda			Insecta			Hymenoptera			Apoidea	Andrenidae	Andreninae	Andrenini		Andrena		sp. F1														(Table 1: Sites 2, 3).
25	Animalia		Arthropoda			Insecta			Hymenoptera			Apoidea	Andrenidae	Andreninae	Andrenini		Andrena		sp. F2														(Table 1: Sites 2-4).
26	Animalia		Arthropoda			Insecta			Hymenoptera			Apoidea	Andrenidae	Andreninae	Andrenini		Andrena		sp. F3														(Table 1: Site 3).
27	Animalia		Arthropoda			Insecta			Hymenoptera			Apoidea		Panurginae
28	Animalia		Arthropoda			Insecta			Hymenoptera			Apoidea			Calliopsini
29	Animalia		Arthropoda			Insecta			Hymenoptera			Apoidea	Andrenidae	Panurginae	Calliopsini		Calliopsis	Calliopsima	chlorops				Cockerell 1899										New species record for Montana (Shinn 1967); (Table 1: Sites 1, 3). The closest records reported in Shinn (1967) for this species are from neighboring states Idaho and Wyoming.
30	Animalia		Arthropoda			Insecta			Hymenoptera			Apoidea	Andrenidae	Panurginae	Calliopsini		Calliopsis	Calliopsima	coloradensis				Cresson 1878										(Table 1: Site 3).
31	Animalia		Arthropoda			Insecta			Hymenoptera			Apoidea	Andrenidae	Panurginae	Calliopsini		Calliopsis	Calliopsis	andreniformis				Smith 1853										(Table 1: Sites 2-4).
32	Animalia		Arthropoda			Insecta			Hymenoptera			Apoidea	Andrenidae	Panurginae	Calliopsini		Calliopsis	Nomadopsis	personata				Cockerell 1897										New species record for Montana (Timberlake 1952, Rozen 1958); (Table 1: Site 1). The closest records reported in Timberlake (1952) and Rozen (1958) for this species are from neighboring states Idaho and Wyoming.
33	Animalia		Arthropoda			Insecta			Hymenoptera			Apoidea			Panurgini
34	Animalia		Arthropoda			Insecta			Hymenoptera			Apoidea	Andrenidae	Panurginae	Panurgini		Panurginus		atriceps				(Cresson 1878)										(Table 1: Sites 1-4).
35	Animalia		Arthropoda			Insecta			Hymenoptera			Apoidea	Andrenidae	Panurginae	Panurgini		Panurginus		sp. F1														(Table 1: Sites 1-4).
36	Animalia		Arthropoda			Insecta			Hymenoptera			Apoidea			Perditini
37	Animalia		Arthropoda			Insecta			Hymenoptera			Apoidea	Andrenidae	Panurginae	Perditini		Perdita	Cockerellia	lingualis				Cockerell 1896										New species record for Montana (Timberlake 1960); (Table 1: Site 1). The closest records reported in Timberlake (1960) for this species are from Colorado, Nebraska, and Utah. Mayer et al. (2000) reported this species from southeastern Washington.
38	Animalia		Arthropoda			Insecta			Hymenoptera			Apoidea	Andrenidae	Panurginae	Perditini		Perdita	Perdita	fallax				Cockerell 1896										(Table 1: Site 3).
39	Animalia		Arthropoda			Insecta			Hymenoptera			Apoidea	Andrenidae	Panurginae	Perditini		Perdita	Perdita	salicis				Cockerell 1896										New species record for Montana (Timberlake 1964); (Table 1: Sites 1, 4). The closest record reported in Timberlake (1964) for this species is from neighboring state Idaho.
40	Animalia		Arthropoda			Insecta			Hymenoptera			Apoidea	Andrenidae	Panurginae	Perditini		Perdita	Pygoperdita	wyomingensis	segona			Timberlake 1956										(Table 1: Sites 2, 3).
41	Animalia		Arthropoda			Insecta			Hymenoptera			Apoidea			Protandrenini
42	Animalia		Arthropoda			Insecta			Hymenoptera			Apoidea	Andrenidae	Panurginae	Protandrenini		Protandrena	Pterosarus	innuptus				(Cockerell 1896)										(Table 1: Sites 1-3).
43	Animalia		Arthropoda			Insecta			Hymenoptera			Apoidea	Andrenidae	Panurginae	Protandrenini		Protandrena	Pterosarus	irregularis				(Cockerell 1922)										New species record for Montana (Cockerell 1922); (Table 1: Site 1); Unpublished record on DiscoverLife (Supplementary Table 2). The closest record reported in Cockerell (1922) and Hurd (1979) for this species is from Colorado.
44	Animalia		Arthropoda			Insecta			Hymenoptera			Apoidea	Andrenidae	Panurginae	Protandrenini		Protandrena	Pterosarus	piercei				(Crawford 1903)										New species record for Montana (Cockerell 1922); (Table 1: Site 1). The closest records reported in Hurd (1979) for this species are from neighboring Canadian province Alberta and from neighboring US state North Dakota.
45	Animalia		Arthropoda			Insecta			Hymenoptera			Apoidea	Apidae
46	Animalia		Arthropoda			Insecta			Hymenoptera			Apoidea		Apinae
47	Animalia		Arthropoda			Insecta			Hymenoptera			Apoidea			Anthophorini
48	Animalia		Arthropoda			Insecta			Hymenoptera			Apoidea	Apidae	Apinae	Anthophorini		Anthophora	Clisodon	terminalis				Cresson 1869										(Table 1: Sites 1-4).
49	Animalia		Arthropoda			Insecta			Hymenoptera			Apoidea	Apidae	Apinae	Anthophorini		Anthophora	Melea	bomboides				Kirby 1837										(Table 1: Site 1).
50	Animalia		Arthropoda			Insecta			Hymenoptera			Apoidea	Apidae	Apinae	Anthophorini		Anthophora	Mystacanthophora	urbana				Cresson 1878										(Table 1: Sites 1, 3, 4).
51	Animalia		Arthropoda			Insecta			Hymenoptera			Apoidea			Apini
52	Animalia		Arthropoda			Insecta			Hymenoptera			Apoidea	Apidae	Apinae	Apini		Apis	Apis	mellifera				Linnaeus 1758						Non-native to North America.				(Table 1: Sites 1-4).
53	Animalia		Arthropoda			Insecta			Hymenoptera			Apoidea			Bombini
54	Animalia		Arthropoda			Insecta			Hymenoptera			Apoidea	Apidae	Apinae	Bombini		Bombus	Bombias	nevadensis				Cresson 1874										(Table 1: Sites 1-4).
55	Animalia		Arthropoda			Insecta			Hymenoptera			Apoidea	Apidae	Apinae	Bombini		Bombus	Bombus	occidentalis				Greene 1858										(Table 1: Sites 1-3).
56	Animalia		Arthropoda			Insecta			Hymenoptera			Apoidea	Apidae	Apinae	Bombini		Bombus	Cullumanobombus	griseocollis				(De Geer 1773)										(Table 1: Site 1).
57	Animalia		Arthropoda			Insecta			Hymenoptera			Apoidea	Apidae	Apinae	Bombini		Bombus	Cullumanobombus	rufocinctus				Cresson 1863										(Table 1: Sites 1-4).
58	Animalia		Arthropoda			Insecta			Hymenoptera			Apoidea	Apidae	Apinae	Bombini		Bombus	Psithyrus	insularis				(Smith 1861)										(Table 1: Sites 1-4).
59	Animalia		Arthropoda			Insecta			Hymenoptera			Apoidea	Apidae	Apinae	Bombini		Bombus	Pyrobombus	bifarius				Cresson 1878										(Table 1: Sites 1-4).
60	Animalia		Arthropoda			Insecta			Hymenoptera			Apoidea	Apidae	Apinae	Bombini		Bombus	Pyrobombus	centralis				Cresson 1864										(Table 1: Sites 1-4).
61	Animalia		Arthropoda			Insecta			Hymenoptera			Apoidea	Apidae	Apinae	Bombini		Bombus	Pyrobombus	flavifrons				Cresson 1863										(Table 1: Sites 2, 4).
62	Animalia		Arthropoda			Insecta			Hymenoptera			Apoidea	Apidae	Apinae	Bombini		Bombus	Pyrobombus	huntii				Greene 1860										(Table 1: Sites 1-4).
63	Animalia		Arthropoda			Insecta			Hymenoptera			Apoidea	Apidae	Apinae	Bombini		Bombus	Pyrobombus	mixtus				Cresson 1878										(Table 1: Sites 1-4).
64	Animalia		Arthropoda			Insecta			Hymenoptera			Apoidea	Apidae	Apinae	Bombini		Bombus	Pyrobombus	sylvicola				Kirby 1837										(Table 1: Site 4).
65	Animalia		Arthropoda			Insecta			Hymenoptera			Apoidea	Apidae	Apinae	Bombini		Bombus	Subterraneobombus	appositus				Cresson 1878										(Table 1: Sites 1-3).
66	Animalia		Arthropoda			Insecta			Hymenoptera			Apoidea	Apidae	Apinae	Bombini		Bombus	Thoracobombus	fervidus				(Fabricius 1798)										(Table 1: Site 1).
67	Animalia		Arthropoda			Insecta			Hymenoptera			Apoidea			Emphorini
68	Animalia		Arthropoda			Insecta			Hymenoptera			Apoidea	Apidae	Apinae	Emphorini		Diadasia	Coquillettapis	diminuta				(Cresson 1878)										(Table 1: Sites 1, 3, 4).
69	Animalia		Arthropoda			Insecta			Hymenoptera			Apoidea			Eucerini
70	Animalia		Arthropoda			Insecta			Hymenoptera			Apoidea	Apidae	Apinae	Eucerini		Melissodes	Callimelissodes	lupinus				Cresson 1878										(Table 1: Sites 1, 4).
71	Animalia		Arthropoda			Insecta			Hymenoptera			Apoidea	Apidae	Apinae	Eucerini		Melissodes	Callimelissodes	metenua				Cockerell 1924										New species record for Montana (LaBerge 1961); (Table 1: Site 3). The closest records reported in LaBerge (1961) and Hurd (1979) for this species are from neighboring states Idaho and Wyoming.
72	Animalia		Arthropoda			Insecta			Hymenoptera			Apoidea	Apidae	Apinae	Eucerini		Melissodes	Eumelissodes	agilis				Cresson 1878										(Table 1: Sites 1-4).
73	Animalia		Arthropoda			Insecta			Hymenoptera			Apoidea	Apidae	Apinae	Eucerini		Melissodes	Eumelissodes	confusus				Cresson 1878										(Table 1: Site 4).
74	Animalia		Arthropoda			Insecta			Hymenoptera			Apoidea	Apidae	Apinae	Eucerini		Melissodes	Eumelissodes	coreopsis				Robertson 1905										(Table 1: Sites 1-4).
75	Animalia		Arthropoda			Insecta			Hymenoptera			Apoidea	Apidae	Apinae	Eucerini		Melissodes	Eumelissodes	hymenoxidis				Cockerell 1906										(Table 1: Site 4).
76	Animalia		Arthropoda			Insecta			Hymenoptera			Apoidea	Apidae	Apinae	Eucerini		Melissodes	Eumelissodes	menuachus				Cresson 1868										(Table 1: Site 1).
77	Animalia		Arthropoda			Insecta			Hymenoptera			Apoidea	Apidae	Apinae	Eucerini		Melissodes	Eumelissodes	microstictus				Cockerell 1905										(Table 1: Sites 1-4).
78	Animalia		Arthropoda			Insecta			Hymenoptera			Apoidea	Apidae	Apinae	Eucerini		Melissodes	Eumelissodes	niveus				Robertson 1895										New species record for Montana (LaBerge 1961); (Table 1: Site 1). The closest records reported in LaBerge (1961) for this species are from Minnesota and Nebraska.
79	Animalia		Arthropoda			Insecta			Hymenoptera			Apoidea	Apidae	Apinae	Eucerini		Melissodes	Eumelissodes	pallidisignatus				Cockerell 1905										(Table 1: Site 1).
80	Animalia		Arthropoda			Insecta			Hymenoptera			Apoidea	Apidae	Apinae	Eucerini		Melissodes	Eumelissodes	perlusus				Cockerell 1925										New species record for Montana (LaBerge 1961); (Table 1: Site 1). The closest records reported in LaBerge (1961) for this species are from neighboring Canadian province Alberta and from neighboring US states North Dakota and Wyoming.
81	Animalia		Arthropoda			Insecta			Hymenoptera			Apoidea	Apidae	Apinae	Eucerini		Melissodes	Melissodes	communis				Cresson 1878										New species record for Montana (LaBerge 1956); (Table 1: Sites 3, 4). The closest records reported in LaBerge (1956) for this species are from neighboring Canadian provinces British Columbia and Alberta and from neighboring US states Idaho, North Dakota, South Dakota, and Wyoming.
82	Animalia		Arthropoda			Insecta			Hymenoptera			Apoidea			Melectini
83	Animalia		Arthropoda			Insecta			Hymenoptera			Apoidea	Apidae	Apinae	Melectini		Xeromelecta	Melectomorpha	californica				(Cresson 1878)										(Table 1: Site 1).
84	Animalia		Arthropoda			Insecta			Hymenoptera			Apoidea		Nomadinae
85	Animalia		Arthropoda			Insecta			Hymenoptera			Apoidea			Epeolini
86	Animalia		Arthropoda			Insecta			Hymenoptera			Apoidea	Apidae	Nomadinae	Epeolini		Epeolus		sp. F1														(Table 1: Site 3).
87	Animalia		Arthropoda			Insecta			Hymenoptera			Apoidea	Apidae	Nomadinae	Epeolini		Triepeolus		paenepectoralis				Viereck 1905										(Table 1: Sites 1, 3, 4).
88	Animalia		Arthropoda			Insecta			Hymenoptera			Apoidea	Apidae	Nomadinae	Epeolini		Triepeolus		sp. F1														(Table 1: Sites 1, 3, 4).
89	Animalia		Arthropoda			Insecta			Hymenoptera			Apoidea	Apidae	Nomadinae	Epeolini		Triepeolus		sp. F2														(Table 1: Site 4).
90	Animalia		Arthropoda			Insecta			Hymenoptera			Apoidea			Nomadini
91	Animalia		Arthropoda			Insecta			Hymenoptera			Apoidea	Apidae	Nomadinae	Nomadini		Nomada		ruficornis group sp. F1														Bidentate; (Table 1: Site 2).
92	Animalia		Arthropoda			Insecta			Hymenoptera			Apoidea	Apidae	Nomadinae	Nomadini		Nomada		ruficornis group sp. F2														Unidentate; (Table 1: Sites 1, 4).
93	Animalia		Arthropoda			Insecta			Hymenoptera			Apoidea	Apidae	Nomadinae	Nomadini		Nomada		ruficornis group sp. F3														Unidentate; (Table 1: Site 2).
94	Animalia		Arthropoda			Insecta			Hymenoptera			Apoidea	Apidae	Nomadinae	Nomadini		Nomada		ruficornis group sp. F4														Bidentate; (Table 1: Site 2).
95	Animalia		Arthropoda			Insecta			Hymenoptera			Apoidea	Apidae	Nomadinae	Nomadini		Nomada		ruficornis group sp. F5														Bidentate; (Table 1: Sites 2, 3).
96	Animalia		Arthropoda			Insecta			Hymenoptera			Apoidea	Apidae	Nomadinae	Nomadini		Nomada		ruficornis group sp. F6														Bidentate; (Table 1: Sites 2-4).
97	Animalia		Arthropoda			Insecta			Hymenoptera			Apoidea	Apidae	Nomadinae	Nomadini		Nomada		ruficornis group sp. F7														Unidentate; (Table 1: Sites 1, 2, 4).
98	Animalia		Arthropoda			Insecta			Hymenoptera			Apoidea	Apidae	Nomadinae	Nomadini		Nomada		ruficornis group sp. F8														Unidentate; (Table 1: Sites 1, 4).
99	Animalia		Arthropoda			Insecta			Hymenoptera			Apoidea	Apidae	Nomadinae	Nomadini		Nomada		ruficornis group sp. F9														Unidentate; (Table 1: Site 1).
100	Animalia		Arthropoda			Insecta			Hymenoptera			Apoidea	Apidae	Nomadinae	Nomadini		Nomada		ruficornis group sp. F10														Unidentate; (Table 1: Sites 2, 4).
101	Animalia		Arthropoda			Insecta			Hymenoptera			Apoidea	Apidae	Nomadinae	Nomadini		Nomada		ruficornis group sp. F11														Unidentate; (Table 1: Sites 2, 3).
102	Animalia		Arthropoda			Insecta			Hymenoptera			Apoidea		Xylocopinae
103	Animalia		Arthropoda			Insecta			Hymenoptera			Apoidea			Ceratinini
104	Animalia		Arthropoda			Insecta			Hymenoptera			Apoidea	Apidae	Xylocopinae	Ceratinini		Ceratina	Zadontomerus	acantha				Provancher 1895										(Table 1: Site 3).
105	Animalia		Arthropoda			Insecta			Hymenoptera			Apoidea	Apidae	Xylocopinae	Ceratinini		Ceratina	Zadontomerus	nanula				Cockerell 1897										(Table 1: Sites 2, 3).
106	Animalia		Arthropoda			Insecta			Hymenoptera			Apoidea	Apidae	Xylocopinae	Ceratinini		Ceratina	Zadontomerus	neomexicana				Cockerell 1901										(Table 1: Sites 2-4).
107	Animalia		Arthropoda			Insecta			Hymenoptera			Apoidea	Colletidae
108	Animalia		Arthropoda			Insecta			Hymenoptera			Apoidea		Colletinae
109	Animalia		Arthropoda			Insecta			Hymenoptera			Apoidea			Colletini
110	Animalia		Arthropoda			Insecta			Hymenoptera			Apoidea	Colletidae	Colletinae	Colletini		Colletes		aff. phaceliae				Cockerell 1906										(Table 1: Site 4).
111	Animalia		Arthropoda			Insecta			Hymenoptera			Apoidea	Colletidae	Colletinae	Colletini		Colletes		consors	pascoensis			Cockerell 1898										(Table 1: Site 4).
112	Animalia		Arthropoda			Insecta			Hymenoptera			Apoidea	Colletidae	Colletinae	Colletini		Colletes		fulgidus	fulgidus			Swenk 1904										(Table 1: Sites 1-4).
113	Animalia		Arthropoda			Insecta			Hymenoptera			Apoidea	Colletidae	Colletinae	Colletini		Colletes		kincaidii				Cockerell 1898										(Table 1: Site 2).
114	Animalia		Arthropoda			Insecta			Hymenoptera			Apoidea	Colletidae	Colletinae	Colletini		Colletes		lutzi	lutzi			Timberlake 1943										(Table 1: Site 1).
115	Animalia		Arthropoda			Insecta			Hymenoptera			Apoidea	Colletidae	Colletinae	Colletini		Colletes		nigrifrons				Titus 1900										(Table 1: Site 2).
116	Animalia		Arthropoda			Insecta			Hymenoptera			Apoidea	Colletidae	Colletinae	Colletini		Colletes		phaceliae				Cockerell 1906										(Table 1: Sites 2-4).
117	Animalia		Arthropoda			Insecta			Hymenoptera			Apoidea		Hylaeinae
118	Animalia		Arthropoda			Insecta			Hymenoptera			Apoidea	Colletidae	Hylaeinae			Hylaeus	Cephalylaeus	basalis				(Smith 1853)										(Table 1: Site 3).
119	Animalia		Arthropoda			Insecta			Hymenoptera			Apoidea	Colletidae	Hylaeinae			Hylaeus	Hylaeus	annulatus				(Linnaeus 1758)										(Table 1: Sites 2, 3).
120	Animalia		Arthropoda			Insecta			Hymenoptera			Apoidea	Colletidae	Hylaeinae			Hylaeus	Hylaeus	conspicuus				(Metz 1911)										(Table 1: Site 3).
121	Animalia		Arthropoda			Insecta			Hymenoptera			Apoidea	Colletidae	Hylaeinae			Hylaeus	Hylaeus	leptocephalus				(Morawitz 1871)						Non-native to North America.				(Table 1: Site 1).
122	Animalia		Arthropoda			Insecta			Hymenoptera			Apoidea	Colletidae	Hylaeinae			Hylaeus	Hylaeus	mesillae				(Cockerell 1896)										(Table 1: Sites 2-4).
123	Animalia		Arthropoda			Insecta			Hymenoptera			Apoidea	Colletidae	Hylaeinae			Hylaeus	Hylaeus	rudbeckiae				(Cockerell and Casad 1895)										(Table 1: Sites 1-4).
124	Animalia		Arthropoda			Insecta			Hymenoptera			Apoidea	Colletidae	Hylaeinae			Hylaeus	Hylaeus	verticalis				(Cresson 1869)										(Table 1: Sites 2, 3).
125	Animalia		Arthropoda			Insecta			Hymenoptera			Apoidea	Colletidae	Hylaeinae			Hylaeus	Paraprosopis	coloradensis				(Cockerell 1896)										(Table 1: Sites 2-4).
126	Animalia		Arthropoda			Insecta			Hymenoptera			Apoidea	Colletidae	Hylaeinae			Hylaeus	Paraprosopis	wootoni				(Cockerell 1896)										(Table 1: Sites 1-4).
127	Animalia		Arthropoda			Insecta			Hymenoptera			Apoidea	Colletidae	Hylaeinae			Hylaeus	Prosopis	affinis				(Smith 1853)										New species record for Montana (Metz 1911, Snelling 1966a); (Table 1: Sites 2-4). The closest records reported in Snelling (1966a) for this species are from neighboring Canadian provinces British Columbia and Saskatchewan and from neighboring US state Idaho.
128	Animalia		Arthropoda			Insecta			Hymenoptera			Apoidea	Colletidae	Hylaeinae			Hylaeus	Prosopis	modestus				Say 1837										(Table 1: Sites 1-3).
129	Animalia		Arthropoda			Insecta			Hymenoptera			Apoidea	Halictidae
130	Animalia		Arthropoda			Insecta			Hymenoptera			Apoidea		Halictinae
131	Animalia		Arthropoda			Insecta			Hymenoptera			Apoidea			Augochlorini
132	Animalia		Arthropoda			Insecta			Hymenoptera			Apoidea	Halictidae	Halictinae	Augochlorini		Augochlorella		aurata				(Smith 1853)										(Table 1: Sites 2, 3).
133	Animalia		Arthropoda			Insecta			Hymenoptera			Apoidea			Halictini
134	Animalia		Arthropoda			Insecta			Hymenoptera			Apoidea	Halictidae	Halictinae	Halictini		Agapostemon	Agapostemon	angelicus				Cockerell 1924										(Table 1: Sites 1, 3, 4).
135	Animalia		Arthropoda			Insecta			Hymenoptera			Apoidea	Halictidae	Halictinae	Halictini		Agapostemon	Agapostemon	femoratus				Crawford 1901										(Table 1: Site 1).
136	Animalia		Arthropoda			Insecta			Hymenoptera			Apoidea	Halictidae	Halictinae	Halictini		Agapostemon	Agapostemon	texanus				Cresson 1872										(Table 1: Site 1).
137	Animalia		Arthropoda			Insecta			Hymenoptera			Apoidea	Halictidae	Halictinae	Halictini		Agapostemon	Agapostemon	virescens				(Fabricius 1775)										(Table 1: Sites 1-4).
138	Animalia		Arthropoda			Insecta			Hymenoptera			Apoidea	Halictidae	Halictinae	Halictini		Halictus	Odontalictus	ligatus				Say 1837										(Table 1: Sites 1-4).
139	Animalia		Arthropoda			Insecta			Hymenoptera			Apoidea	Halictidae	Halictinae	Halictini		Halictus	Protohalictus	rubicundus				(Christ 1791)										(Table 1: Sites 1-4).
140	Animalia		Arthropoda			Insecta			Hymenoptera			Apoidea	Halictidae	Halictinae	Halictini		Halictus	Seladonia	confusus				Smith 1853										(Table 1: Sites 1-4).
141	Animalia		Arthropoda			Insecta			Hymenoptera			Apoidea	Halictidae	Halictinae	Halictini		Halictus	Seladonia	tripartitus				Cockerell 1895										(Table 1: Sites 1-4).
142	Animalia		Arthropoda			Insecta			Hymenoptera			Apoidea	Halictidae	Halictinae	Halictini		Lasioglossum	Dialictus	aff. admirandum				(Sandhouse 1924)										(Table 1: Sites 2, 4).
143	Animalia		Arthropoda			Insecta			Hymenoptera			Apoidea	Halictidae	Halictinae	Halictini		Lasioglossum	Dialictus	clematisellum				(Cockerell 1904)										New species record for Montana (Sandhouse 1924); (Table 1: Site 1). The closest record reported in Hurd (1979) for this species is from Utah.
144	Animalia		Arthropoda			Insecta			Hymenoptera			Apoidea	Halictidae	Halictinae	Halictini		Lasioglossum	Dialictus	cressonii				(Robertson 1890)										New species record for Montana (Sandhouse 1924, Gibbs 2010); (Table 1: Site 4); Unpublished record on DiscoverLife (Supplementary Table 2). The closest records reported in Gibbs (2010) for this species are from neighboring Canadian provinces British Columbia and Alberta.
145	Animalia		Arthropoda			Insecta			Hymenoptera			Apoidea	Halictidae	Halictinae	Halictini		Lasioglossum	Dialictus	laevissimum				(Smith 1853)										New species record for Montana(Sandhouse 1924, Gibbs 2010); (Table 1: Sites 1-4); Unpublished record on DiscoverLife (Supplementary Table 2). The closest records reported in Gibbs (2010) for this species are from neighboring Canadian provinces British Columbia, Alberta, and Saskatchewan.
146	Animalia		Arthropoda			Insecta			Hymenoptera			Apoidea	Halictidae	Halictinae	Halictini		Lasioglossum	Dialictus	lilliputense				Gibbs 2010										(Table 1: Sites 2-4).
147	Animalia		Arthropoda			Insecta			Hymenoptera			Apoidea	Halictidae	Halictinae	Halictini		Lasioglossum	Dialictus	lineatulum				(Crawford 1906)										New species record for Montana (Gibbs 2010); (Table 1: Site 2). The closest records reported in Gibbs (2010) for this species are from neighboring Canadian provinces Alberta and Saskatchewan.
148	Animalia		Arthropoda			Insecta			Hymenoptera			Apoidea	Halictidae	Halictinae	Halictini		Lasioglossum	Dialictus	occidentale				(Crawford 1902)										(Table 1: Sites 1-4).
149	Animalia		Arthropoda			Insecta			Hymenoptera			Apoidea	Halictidae	Halictinae	Halictini		Lasioglossum	Dialictus	semicaeruleum				(Cockerell 1895)										(Table 1: Sites 1, 3).
150	Animalia		Arthropoda			Insecta			Hymenoptera			Apoidea	Halictidae	Halictinae	Halictini		Lasioglossum	Dialictus	succinipenne				(Ellis 1913)										(Table 1: Site 2).
151	Animalia		Arthropoda			Insecta			Hymenoptera			Apoidea	Halictidae	Halictinae	Halictini		Lasioglossum	Dialictus	versans				(Lovell 1905)										New species record for Montana (Sandhouse 1924, Gibbs 2010); (Table 1: Site 3). The closest record reported in Gibbs (2010) for this species is from neighboring Canadian province Alberta.
152	Animalia		Arthropoda			Insecta			Hymenoptera			Apoidea	Halictidae	Halictinae	Halictini		Lasioglossum	Dialictus	zephyrum				(Smith 1853)										(Table 1: Site 1).
153	Animalia		Arthropoda			Insecta			Hymenoptera			Apoidea	Halictidae	Halictinae	Halictini		Lasioglossum	Dialictus	spp.														(Table 1: Sites 1-4).
154	Animalia		Arthropoda			Insecta			Hymenoptera			Apoidea	Halictidae	Halictinae	Halictini		Lasioglossum	Evylaeus	spp.														(Table 1: Site 1).
155	Animalia		Arthropoda			Insecta			Hymenoptera			Apoidea	Halictidae	Halictinae	Halictini		Lasioglossum	Hemihalictus	ovaliceps				(Cockerell, 1898)										(Table 1: Site 3).
156	Animalia		Arthropoda			Insecta			Hymenoptera			Apoidea	Halictidae	Halictinae	Halictini		Lasioglossum	Lasioglossum	egregium				(Vachal 1904)										(Table 1: Site 2).
157	Animalia		Arthropoda			Insecta			Hymenoptera			Apoidea	Halictidae	Halictinae	Halictini		Lasioglossum	Lasioglossum	mellipes				(Crawford 1907)										New species record for Montana (McGinley 1986); (Table 1: Site 4). The closest records reported in McGinley (1986) for this species are from neighboring Canadian province British Columbia and from neighboring US state Idaho.
158	Animalia		Arthropoda			Insecta			Hymenoptera			Apoidea	Halictidae	Halictinae	Halictini		Lasioglossum	Lasioglossum	paraforbesii				McGinley 1986										(Table 1: Site 1).
159	Animalia		Arthropoda			Insecta			Hymenoptera			Apoidea	Halictidae	Halictinae	Halictini		Lasioglossum	Lasioglossum	sisymbrii				(Cockerell 1895)										(Table 1: Site 2).
160	Animalia		Arthropoda			Insecta			Hymenoptera			Apoidea	Halictidae	Halictinae	Halictini		Lasioglossum	Lasioglossum	titusi				(Crawford 1902)										(Table 1: Sites 2, 3).
161	Animalia		Arthropoda			Insecta			Hymenoptera			Apoidea	Halictidae	Halictinae	Halictini		Lasioglossum	Leuchalictus	zonulum				(Smith 1848)										(Table 1: Sites 1, 4).
162	Animalia		Arthropoda			Insecta			Hymenoptera			Apoidea	Halictidae	Halictinae	Halictini		Lasioglossum	Sphecodogastra	lusorium				(Cresson 1872)										(Table 1: Site 1).
163	Animalia		Arthropoda			Insecta			Hymenoptera			Apoidea	Halictidae	Halictinae	Halictini		Sphecodes		sp. F1														(Table 1: Sites 2, 4).
164	Animalia		Arthropoda			Insecta			Hymenoptera			Apoidea	Halictidae	Halictinae	Halictini		Sphecodes		spp.														(Table 1: Sites 1-4).
165	Animalia		Arthropoda			Insecta			Hymenoptera			Apoidea		Rophitinae
166	Animalia		Arthropoda			Insecta			Hymenoptera			Apoidea	Halictidae	Rophitinae			Dufourea		marginata				(Cresson 1878)										New species record for Montana (Michener 1951); (Table 1: Sites 1, 4). The closest records reported in Hurd (1979) for this species are from neighboring Canadian province Alberta and from neighboring state Wyoming.
167	Animalia		Arthropoda			Insecta			Hymenoptera			Apoidea	Halictidae	Rophitinae			Dufourea		maura				(Cresson 1878)										(Table 1: Sites 2, 3).
168	Animalia		Arthropoda			Insecta			Hymenoptera			Apoidea	Halictidae	Rophitinae			Dufourea		trochantera				Bohart 1948										(Table 1: Site 4).
169	Animalia		Arthropoda			Insecta			Hymenoptera			Apoidea	Megachilidae
170	Animalia		Arthropoda			Insecta			Hymenoptera			Apoidea		Megachilinae
171	Animalia		Arthropoda			Insecta			Hymenoptera			Apoidea			Anthidiini
172	Animalia		Arthropoda			Insecta			Hymenoptera			Apoidea	Megachilidae	Megachilinae	Anthidiini		Anthidium	Anthidium	mormonum				Cresson 1878										(Table 1: Sites 1, 3).
173	Animalia		Arthropoda			Insecta			Hymenoptera			Apoidea	Megachilidae	Megachilinae	Anthidiini		Anthidium	Anthidium	tenuiflorae				Cockerell 1907										(Table 1: Sites 1-4).
174	Animalia		Arthropoda			Insecta			Hymenoptera			Apoidea	Megachilidae	Megachilinae	Anthidiini		Dianthidium	Dianthidium	heterulkei				Schwarz 1940										New species record for Montana (Timberlake 1943, Grigarick and Stange 1968); (Table 1: Site 3). The closest record reported in Hurd (1979) for this species is from neighboring state Wyoming.
175	Animalia		Arthropoda			Insecta			Hymenoptera			Apoidea	Megachilidae	Megachilinae	Anthidiini		Dianthidium	Dianthidium	subparvum				Swenk 1914										(Table 1: Sites 2, 3).
176	Animalia		Arthropoda			Insecta			Hymenoptera			Apoidea	Megachilidae	Megachilinae	Anthidiini		Stelis	Stelis	calliphorina				(Cockerell 1911)										(Table 1: Site 3).
177	Animalia		Arthropoda			Insecta			Hymenoptera			Apoidea	Megachilidae	Megachilinae	Anthidiini		Stelis	Stelis	foederalis group sp. 6														(Table 1: Site 3).
178	Animalia		Arthropoda			Insecta			Hymenoptera			Apoidea	Megachilidae	Megachilinae	Anthidiini		Stelis	Stelis	lateralis				Cresson 1864										(Table 1: Sites 2, 4).
179	Animalia		Arthropoda			Insecta			Hymenoptera			Apoidea	Megachilidae	Megachilinae	Anthidiini		Stelis	Stelis	montana				Cresson 1864										(Table 1: Site 3).
180	Animalia		Arthropoda			Insecta			Hymenoptera			Apoidea	Megachilidae	Megachilinae	Anthidiini		Stelis	Stelis	occidentalis				Parker & Griswold 2013										New species record for Montana (Parker and Griswold 2013); (Table 1: Site 3). The closest records reported in Parker and Griswold (2013) for this species are from neighboring Canadian province British Columbia and from neighboring US state Idaho.
181	Animalia		Arthropoda			Insecta			Hymenoptera			Apoidea	Megachilidae	Megachilinae	Anthidiini		Stelis	Stelis	permaculata				Cockerell 1898										(Table 1: Site 2).
182	Animalia		Arthropoda			Insecta			Hymenoptera			Apoidea	Megachilidae	Megachilinae	Anthidiini		Stelis	Stelis	subcaerulea				Cresson 1878										New species record for Montana (Cockerell 1911); (Table 1: Site 3). The closest record reported in Hurd (1979) for this species is from neighboring state Wyoming.
183	Animalia		Arthropoda			Insecta			Hymenoptera			Apoidea	Megachilidae	Megachilinae	Anthidiini		Stelis	Stelis	subemarginata group sp. 1														(Table 1: Sites 2, 4).
184	Animalia		Arthropoda			Insecta			Hymenoptera			Apoidea			Megachilini
185	Animalia		Arthropoda			Insecta			Hymenoptera			Apoidea	Megachilidae	Megachilinae	Megachilini		Coelioxys	Boreocoelioxys	moestus				Cresson 1864										(Table 1: Sites 2, 3).
186	Animalia		Arthropoda			Insecta			Hymenoptera			Apoidea	Megachilidae	Megachilinae	Megachilini		Coelioxys	Boreocoelioxys	rufitarsis				Smith 1854										(Table 1: Sites 1-4).
187	Animalia		Arthropoda			Insecta			Hymenoptera			Apoidea	Megachilidae	Megachilinae	Megachilini		Coelioxys	Coelioxys	sodalis				Cresson 1878										(Table 1: Site 4).
188	Animalia		Arthropoda			Insecta			Hymenoptera			Apoidea	Megachilidae	Megachilinae	Megachilini		Coelioxys	Synocoelioxys	alternatus				Say 1837										(Table 1: Sites 2, 3).
189	Animalia		Arthropoda			Insecta			Hymenoptera			Apoidea	Megachilidae	Megachilinae	Megachilini		Megachile	Argyropile	parallela				Smith 1853										(Table 1: Sites 1, 3, 4).
190	Animalia		Arthropoda			Insecta			Hymenoptera			Apoidea	Megachilidae	Megachilinae	Megachilini		Megachile	Chelostomoides	angelarum				Cockerell 1902										(Table 1: Sites 2, 3).
191	Animalia		Arthropoda			Insecta			Hymenoptera			Apoidea	Megachilidae	Megachilinae	Megachilini		Megachile	Chelostomoides	campanulae				(Robertson 1903)										(Table 1: Site 2).
192	Animalia		Arthropoda			Insecta			Hymenoptera			Apoidea	Megachilidae	Megachilinae	Megachilini		Megachile	Eutricharaea	apicalis				Spinola 1808						Non-native to North America.				(Table 1: Sites 2-4).
193	Animalia		Arthropoda			Insecta			Hymenoptera			Apoidea	Megachilidae	Megachilinae	Megachilini		Megachile	Eutricharaea	rotundata				(Fabricius 1787)						Non-native to North America.				(Table 1: Sites 1, 3, 4).
194	Animalia		Arthropoda			Insecta			Hymenoptera			Apoidea	Megachilidae	Megachilinae	Megachilini		Megachile	Litomegachile	brevis				Say 1837										(Table 1: Site 1).
195	Animalia		Arthropoda			Insecta			Hymenoptera			Apoidea	Megachilidae	Megachilinae	Megachilini		Megachile	Megachile	lapponica				Thomson 1872										(Table 1: Sites 2, 3).
196	Animalia		Arthropoda			Insecta			Hymenoptera			Apoidea	Megachilidae	Megachilinae	Megachilini		Megachile	Megachile	montivaga				Cresson 1878										(Table 1: Sites 2-4).
197	Animalia		Arthropoda			Insecta			Hymenoptera			Apoidea	Megachilidae	Megachilinae	Megachilini		Megachile	Megachile	relativa				Cresson 1878										(Table 1: Sites 1-4).
198	Animalia		Arthropoda			Insecta			Hymenoptera			Apoidea	Megachilidae	Megachilinae	Megachilini		Megachile	Megachiloides	anograe				Cockerell 1908										(Table 1: Site 4).
199	Animalia		Arthropoda			Insecta			Hymenoptera			Apoidea	Megachilidae	Megachilinae	Megachilini		Megachile	Megachiloides	subnigra				Cresson 1879										(Table 1: Site 1).
200	Animalia		Arthropoda			Insecta			Hymenoptera			Apoidea	Megachilidae	Megachilinae	Megachilini		Megachile	Sayapis	pugnata				Say 1837										(Table 1: Sites 1-4).
201	Animalia		Arthropoda			Insecta			Hymenoptera			Apoidea	Megachilidae	Megachilinae	Megachilini		Megachile	Xanthosarus	frigida				Smith 1853										(Table 1: Sites 1, 2, 4).
202	Animalia		Arthropoda			Insecta			Hymenoptera			Apoidea	Megachilidae	Megachilinae	Megachilini		Megachile	Xanthosarus	latimanus				Say 1823										(Table 1: Site 1).
203	Animalia		Arthropoda			Insecta			Hymenoptera			Apoidea	Megachilidae	Megachilinae	Megachilini		Megachile	Xanthosarus	melanophaea				Smith 1853										(Table 1: Sites 1-3).
204	Animalia		Arthropoda			Insecta			Hymenoptera			Apoidea	Megachilidae	Megachilinae	Megachilini		Megachile	Xanthosarus	perihirta				Cockerell 1898										(Table 1: Sites 1-4).
205	Animalia		Arthropoda			Insecta			Hymenoptera			Apoidea			Osmiini
206	Animalia		Arthropoda			Insecta			Hymenoptera			Apoidea	Megachilidae	Megachilinae	Osmiini		Ashmeadiella	Ashmeadiella	bucconis				(Say 1837)										(Table 1: Sites 1, 3, 4).
207	Animalia		Arthropoda			Insecta			Hymenoptera			Apoidea	Megachilidae	Megachilinae	Osmiini		Heriades	Neotrypetes	carinata				Cresson 1864										(Table 1: Sites 1-4).
208	Animalia		Arthropoda			Insecta			Hymenoptera			Apoidea	Megachilidae	Megachilinae	Osmiini		Heriades	Neotrypetes	cressoni				Michener 1938										(Table 1: Sites 2, 3).
209	Animalia		Arthropoda			Insecta			Hymenoptera			Apoidea	Megachilidae	Megachilinae	Osmiini		Heriades	Neotrypetes	variolosa				(Cresson 1872)										(Table 1: Sites 1-4).
210	Animalia		Arthropoda			Insecta			Hymenoptera			Apoidea	Megachilidae	Megachilinae	Osmiini		Hoplitis	Alcidamea	fulgida				(Cresson 1864)										(Table 1: Sites 2, 3).
211	Animalia		Arthropoda			Insecta			Hymenoptera			Apoidea	Megachilidae	Megachilinae	Osmiini		Hoplitis	Alcidamea	grinnelli				(Cockerell 1910)										(Table 1: Sites 2-4).
212	Animalia		Arthropoda			Insecta			Hymenoptera			Apoidea	Megachilidae	Megachilinae	Osmiini		Hoplitis	Alcidamea	hypocrita				(Cockerell 1906)										(Table 1: Site 2).
213	Animalia		Arthropoda			Insecta			Hymenoptera			Apoidea	Megachilidae	Megachilinae	Osmiini		Hoplitis	Alcidamea	pilosifrons				(Cresson 1864)										(Table 1: Site 4).
214	Animalia		Arthropoda			Insecta			Hymenoptera			Apoidea	Megachilidae	Megachilinae	Osmiini		Hoplitis	Alcidamea	producta				(Cresson 1864)										(Table 1: Sites 1-4).
215	Animalia		Arthropoda			Insecta			Hymenoptera			Apoidea	Megachilidae	Megachilinae	Osmiini		Hoplitis	Alcidamea	spoliata				(Provancher 1888)										New species record for Montana (Michener 1947, Mitchell 1960); (Table 1: Sites 3, 4); Unpublished record on DiscoverLife (Supplementary Table 2). The closest records reported in Michener (1947) for this species are from neighboring Canadian provinces British Columbia and Saskatchewan and from neighboring US state North Dakota.
216	Animalia		Arthropoda			Insecta			Hymenoptera			Apoidea	Megachilidae	Megachilinae	Osmiini		Hoplitis	Formicapis	robusta				(Nylander 1848)										(Table 1: Sites 2-4).
217	Animalia		Arthropoda			Insecta			Hymenoptera			Apoidea	Megachilidae	Megachilinae	Osmiini		Osmia	Cephalosmia	marginipennis				Cresson 1878										(Table 1: Site 2).
218	Animalia		Arthropoda			Insecta			Hymenoptera			Apoidea	Megachilidae	Megachilinae	Osmiini		Osmia	Cephalosmia	subaustralis				Cockerell 1900										(Table 1: Site 3).
219	Animalia		Arthropoda			Insecta			Hymenoptera			Apoidea	Megachilidae	Megachilinae	Osmiini		Osmia	Helicosmia	coloradensis				Cresson 1878										(Table 1: Sites 2-4).
220	Animalia		Arthropoda			Insecta			Hymenoptera			Apoidea	Megachilidae	Megachilinae	Osmiini		Osmia	Melanosmia	aff. paradisica				Sandhouse 1924										(Table 1: Sites 3, 4).
221	Animalia		Arthropoda			Insecta			Hymenoptera			Apoidea	Megachilidae	Megachilinae	Osmiini		Osmia	Melanosmia	aff. phaceliae				Cockerell 1907										(Table 1: Site 3).
222	Animalia		Arthropoda			Insecta			Hymenoptera			Apoidea	Megachilidae	Megachilinae	Osmiini		Osmia	Melanosmia	albolateralis				Cockerell 1906										(Table 1: Sites 2-4).
223	Animalia		Arthropoda			Insecta			Hymenoptera			Apoidea	Megachilidae	Megachilinae	Osmiini		Osmia	Melanosmia	atrocyanea				Cockerell 1897										(Table 1: Site 2).
224	Animalia		Arthropoda			Insecta			Hymenoptera			Apoidea	Megachilidae	Megachilinae	Osmiini		Osmia	Melanosmia	brevis				Cresson 1864										(Table 1: Sites 2, 3).
225	Animalia		Arthropoda			Insecta			Hymenoptera			Apoidea	Megachilidae	Megachilinae	Osmiini		Osmia	Melanosmia	bruneri				Cockerell 1897										(Table 1: Site 1).
226	Animalia		Arthropoda			Insecta			Hymenoptera			Apoidea	Megachilidae	Megachilinae	Osmiini		Osmia	Melanosmia	ednae				Cockerell 1907										(Table 1: Sites 2-4).
227	Animalia		Arthropoda			Insecta			Hymenoptera			Apoidea	Megachilidae	Megachilinae	Osmiini		Osmia	Melanosmia	kincaidii				Cockerell 1897										(Table 1: Site 3).
228	Animalia		Arthropoda			Insecta			Hymenoptera			Apoidea	Megachilidae	Megachilinae	Osmiini		Osmia	Melanosmia	odontogaster group sp. 1														Formerly, subgenus Acanthosmioides Ashmead (Rightmyer et al. 2013); (Table 1: Site 1).
229	Animalia		Arthropoda			Insecta			Hymenoptera			Apoidea	Megachilidae	Megachilinae	Osmiini		Osmia	Melanosmia	paradisica				Sandhouse 1924										(Table 1: Site 4).
230	Animalia		Arthropoda			Insecta			Hymenoptera			Apoidea	Megachilidae	Megachilinae	Osmiini		Osmia	Melanosmia	pusilla				Cresson 1864										(Table 1: Sites 2-4).
231	Animalia		Arthropoda			Insecta			Hymenoptera			Apoidea	Megachilidae	Megachilinae	Osmiini		Osmia	Melanosmia	sculleni				Sandhouse 1939										(Table 1: Site 4).
232	Animalia		Arthropoda			Insecta			Hymenoptera			Apoidea	Megachilidae	Megachilinae	Osmiini		Osmia	Melanosmia	sedula				Sandhouse 1924										New species record for Montana (Sandhouse 1939, White 1952); (Table 1: Sites 2-4). The closest records reported in Sandhouse (1939) and White (1952) for this species are from neighboring Canadian province British Columbia and from neighboring US state Wyoming.
233	Animalia		Arthropoda			Insecta			Hymenoptera			Apoidea	Megachilidae	Megachilinae	Osmiini		Osmia	Melanosmia	simillima				Smith 1853										(Table 1: Sites 2, 3).
234	Animalia		Arthropoda			Insecta			Hymenoptera			Apoidea	Megachilidae	Megachilinae	Osmiini		Osmia	Melanosmia	tersula				Cockerell 1912										(Table 1: Site 3).
235	Animalia		Arthropoda			Insecta			Hymenoptera			Apoidea	Megachilidae	Megachilinae	Osmiini		Osmia	Melanosmia	trevoris				Cockerell 1897										(Table 1: Sites 1-4).
236	Animalia		Arthropoda			Insecta			Hymenoptera			Apoidea	Megachilidae	Megachilinae	Osmiini		Osmia	Melanosmia	tristella				Cockerell 1897										(Table 1: Sites 2-4).
237	Animalia		Arthropoda			Insecta			Hymenoptera			Apoidea	Megachilidae	Megachilinae	Osmiini		Osmia	Melanosmia	sp. F1														(Table 1: Site 3).

## Sheet: Materials
Taxon_Local_ID	typeStatus	occurrenceID	catalogNumber	occurrenceDetails	occurrenceRemarks	recordNumber	recordedBy	individualID	individualCount	sex	lifeStage	reproductiveCondition	behavior	establishmentMeans	occurrenceStatus	preparations	disposition	otherCatalogNumbers	previousIdentifications	associatedMedia	associatedReferences	associatedOccurrences	associatedSequences	taxonID	scientificNameID	acceptedNameUsageID	parentNameUsageID	originalNameUsageID	nameAccordingToID	namePublishedInID	taxonConceptID	scientificName	acceptedNameUsage	parentNameUsage	originalNameUsage	nameAccordingTo	namePublishedIn	higherClassification	kingdom	phylum	class	order	family	genus	subgenus	specificEpithet	infraspecificEpithet	taxonRank	verbatimTaxonRank
[truncated: 107 more columns]

## Sheet: ExternalLinks
Taxon_Local_ID	Link type	Link
