# Supplementary material for: Checklist of bees (Hymenoptera: Apoidea) from small diversified vegetable farms in south-western Montana
Source: Biodivers Data J. 2019 Jan 28;(7):e30062. doi: 10.3897/BDJ.7.e30062 (PMC6361878; doi:10.3897/BDJ.7.e30062)
Supplement: Supplementary material 6 — Supplementary Table 6 [file bdj-07-e30062-s006.xlsx]

## Sheet: Sheet1
Genus	Species	Number of Individuals
Andrena	astragali	5
Andrena	candida	6
Andrena	costillensis	2
Andrena	cressonii	20
Andrena	helianthi	107
Andrena	hippotes	1
Andrena	medionitens	21
Andrena	microchlora	4
Andrena	miranda	4
Andrena	nasonii	4
Andrena	nigrocaerulea	28
Andrena	nivalis	2
Andrena	nothocalaidis	3
Andrena	prunorum	19
Andrena	scurra	2
Andrena	sp. F1	7
Andrena	sp. F2	6
Andrena	sp. F3	1
Andrena	thaspii	3
Andrena	topazana	2
Andrena	vierecki	4
Andrena	aff. wilmattae	1
Andrena	pallidifovea	14
Calliopsis	andreniformis	14
Calliopsis	chlorops	5
Calliopsis	coloradensis	1
Calliopsis	personata	2
Panurginus	atriceps	588
Panurginus	sp. F1	528
Perdita	fallax	4
Perdita	lingualis	3
Perdita	salicis	3
Perdita	wyomingensis	3
Protandrena	piercei	1
Protandrena	innuptus	80
Protandrena	irregularis	3
Anthophora	bomboides	2
Anthophora	terminalis	9
Anthophora	urbana	9
Apis	mellifera	1301
Bombus	appositus	15
Bombus	bifarius	37
Bombus	centralis	204
Bombus	fervidus	3
Bombus	flavifrons	2
Bombus	griseocollis	2
Bombus	huntii	407
Bombus	insularis	15
Bombus	mixtus	8
Bombus	nevadensis	23
Bombus	occidentalis	7
Bombus	rufocinctus	156
Bombus	sylvicola	3
Ceratina	acantha	1
Ceratina	nanula	25
Ceratina	neomexicana	79
Diadasia	diminuta	13
Epeolus	sp. F1	1
Melissodes	agilis	274
Melissodes	communis	2
Melissodes	confusus	1
Melissodes	coreopsis	23
Melissodes	hymenoxidis	1
Melissodes	lupinus	3
Melissodes	menuachus	2
Melissodes	metenua	1
Melissodes	microstictus	31
Melissodes	niveus	2
Melissodes	pallidisignatus	1
Melissodes	perlusus	1
Nomada	sp. F1	2
Nomada	sp. F10	7
Nomada	sp. F11	7
Nomada	sp. F2	8
Nomada	sp. F3	3
Nomada	sp. F4	1
Nomada	sp. F5	4
Nomada	sp. F6	11
Nomada	sp. F7	4
Nomada	sp. F8	2
Nomada	sp. F9	4
Triepeolus	paenepectoralis	6
Triepeolus	sp. F1	10
Triepeolus	sp. F2	1
Xeromelecta	californica	1
Colletes	aff. phaceliae	1
Colletes	consors	1
Colletes	fulgidus	13
Colletes	kincaidii	1
Colletes	lutzi	1
Colletes	nigrifrons	1
Colletes	phaceliae	6
Hylaeus	affinis	24
Hylaeus	annulatus	10
Hylaeus	basalis	1
Hylaeus	coloradensis	7
Hylaeus	conspicuus	1
Hylaeus	leptocephalus	2
Hylaeus	mesillae	178
Hylaeus	modestus	34
Hylaeus	rudbeckiae	93
Hylaeus	verticalis	7
Hylaeus	wootoni	163
Hylaeus	angelicus	52
Agapostemon	femoratus	1
Agapostemon	texanus	66
Agapostemon	virescens	59
Augochlorella	aurata	191
Dufourea	marginata	3
Dufourea	maura	2
Dufourea	trochantera	1
Halictus	confusus	181
Halictus	ligatus	679
Halictus	rubicundus	283
Halictus	tripartitus	454
Lasioglossum	Dialictus_spp.	4108
Lasioglossum	lilliputense	4
Lasioglossum	lineatulum	1
Lasioglossum	aff. admirandum	2
Lasioglossum	occidentale	7
Lasioglossum	semicaeruleum	7
Lasioglossum	versans	1
Lasioglossum	zephyrum	11
Lasioglossum	clematisellum	1
Lasioglossum	cressonii	1
Lasioglossum	laevissimum	19
Lasioglossum	succinipenne	11
Lasioglossum	Evylaeus_spp.	106
Lasioglossum	ovaliceps	2
Lasioglossum	egregium	1
Lasioglossum	mellipes	1
Lasioglossum	paraforbesii	2
Lasioglossum	sisymbrii	1
Lasioglossum	titusi	32
Lasioglossum	zonulum	4
Lasioglossum	lusorium	2
Sphecodes	spp.	152
Sphecodes	sp. F1	4
Anthidium	mormonum	2
Anthidium	tenuiflorae	5
Ashmeadiella	bucconis	5
Coelioxys	alternata	4
Coelioxys	moestus	2
Coelioxys	rufitarsis	10
Coelioxys	sodalis	1
Dianthidium	heterulkei	1
Dianthidium	subparvum	9
Heriades	cressoni	4
Heriades	variolosa	25
Heriades	carinata	319
Hoplitis	fulgida	13
Hoplitis	grinnelli	29
Hoplitis	hypocrita	3
Hoplitis	pilosifrons	1
Hoplitis	producta	64
Hoplitis	robusta	18
Hoplitis	spoliata	2
Megachile	angelarum	3
Megachile	anograe	1
Megachile	apicalis	4
Megachile	brevis	8
Megachile	campanulae	4
Megachile	frigida	7
Megachile	lapponica	2
Megachile	latimanus	1
Megachile	melanophaea	4
Megachile	montivaga	8
Megachile	parallela	12
Megachile	perihirta	134
Megachile	pugnata	22
Megachile	relativa	23
Megachile	rotundata	9
Megachile	subnigra	1
Osmia	aff. phaceliae	1
Osmia	aff. paradisica	3
Osmia	albolateralis	4
Osmia	atrocyanea	2
Osmia	brevis	2
Osmia	bruneri	1
Osmia	coloradensis	10
Osmia	ednae	37
Osmia	kincaidii	1
Osmia	marginipennis	1
Osmia	odontogaster group sp. 1	1
Osmia	paradisica	1
Osmia	pusilla	11
Osmia	sculleni	1
Osmia	sedula	4
Osmia	simillima	3
Osmia	sp. F1	4
Osmia	subaustralis	1
Osmia	tersula	1
Osmia	trevoris	37
Osmia	tristella	14
Stelis	calliphorina	1
Stelis	lateralis	3
Stelis	montana	1
Stelis	occidentalis	1
Stelis	permaculata	1
Stelis	subcaerulea	1
Stelis	foederalis group sp. 6	1
Stelis	subemarginata group sp. 1	2
